# Supplementary material for: The Protective Effects of Sour Orange (Citrus aurantium L.) Polymethoxyflavones on Mice Irradiation-Induced Intestinal Injury
Source: MDPI journal article supplement (doi:10.3390/molecules27061934), 2022-03-16
Supplement: s1 [file s1]

**Table S1.** GO/KEGG enrichment results of differential expressed genes obtained from GSE126507

| ONTOLOGY | ID         | Description                                                             | Gene Ratio | <i>p. adjust</i> | Gene IDs                                                                                                                                                           | Count | Z score  |
|----------|------------|-------------------------------------------------------------------------|------------|------------------|--------------------------------------------------------------------------------------------------------------------------------------------------------------------|-------|----------|
| BP       | GO:0051673 | membrane disruption in other organism                                   | 12/736     | 2.78E-05         | Defa17/Defa2/Defa21/Defa22/Defa23/Defa24/Defa3/Defa30/Defa31/Defa34/Defa5/Ltf                                                                                      | 12    | 3.464102 |
| BP       | GO:0035456 | response to interferon-beta                                             | 13/736     | 3.75E-05         | F830016B08Rik/Gm12185/Gm4951/Ifi204/Ifi207/Ifi211/Ifi213/Ifitm3/Iigp1/Irgm1/Tgtp1/Tgtp2/Xaf1                                                                       | 13    | 3.605551 |
| BP       | GO:0019731 | antibacterial humoral response                                          | 14/736     | 9.48E-05         | Defa17/Defa2/Defa21/Defa22/Defa23/Defa24/Defa3/Defa30/Defa31/Defa34/Defa5/Ltf/Pla2g6/Spon2                                                                         | 14    | 3.207135 |
| BP       | GO:0035458 | cellular response to interferon-beta                                    | 11/736     | 0.000139         | F830016B08Rik/Gm12185/Gm4951/Ifi204/Ifi207/Ifi211/Ifi213/Iigp1/Irgm1/Tgtp1/Tgtp2                                                                                   | 11    | 3.316625 |
| BP       | GO:0002227 | innate immune response in mucosa                                        | 12/736     | 0.000139         | Defa17/Defa2/Defa21/Defa22/Defa23/Defa24/Defa3/Defa30/Defa31/Defa34/Defa5/Ltf                                                                                      | 12    | 3.464102 |
| BP       | GO:0050829 | defense response to Gram-negative bacterium                             | 16/736     | 0.000269         | Cxcl5/Defa17/Defa2/Defa21/Defa22/Defa23/Defa24/Defa3/Defa30/Defa31/Defa34/Defa5/Iigp1/Il23a/Ltf/Lyz1                                                               | 16    | 4        |
| BP       | GO:0002385 | mucosal immune response                                                 | 12/736     | 0.001259         | Defa17/Defa2/Defa21/Defa22/Defa23/Defa24/Defa3/Defa30/Defa31/Defa34/Defa5/Ltf                                                                                      | 12    | 3.464102 |
| BP       | GO:0002251 | organ or tissue specific immune response                                | 12/736     | 0.001501         | Defa17/Defa2/Defa21/Defa22/Defa23/Defa24/Defa3/Defa30/Defa31/Defa34/Defa5/Ltf                                                                                      | 12    | 3.464102 |
| BP       | GO:0019730 | antimicrobial humoral response                                          | 15/736     | 0.001903         | Cxcl5/Defa17/Defa2/Defa21/Defa22/Defa23/Defa24/Defa3/Defa30/Defa31/Defa34/Defa5/Ltf/Pla2g6/Spon2                                                                   | 15    | 3.356586 |
| BP       | GO:0061844 | antimicrobial humoral immune response mediated by antimicrobial peptide | 13/736     | 0.003952         | Cxcl5/Defa17/Defa2/Defa21/Defa22/Defa23/Defa24/Defa3/Defa30/Defa31/Defa34/Defa5/Ltf                                                                                | 13    | 3.605551 |
| BP       | GO:0034404 | nucleobase-containing small molecule biosynthetic process               | 18/736     | 0.004002         | Adk/Aprt/Art2b/Cad/Ctps2/Dera/Enpp5/Entpd5/Gck/Hk1/Iifng/Igf1/Nme4/Nudt1/P2rx7/Pde4d/Pfkfb2/Prkag2                                                                 | 18    | 0.471405 |
| BP       | GO:0051271 | negative regulation of cellular component movement                      | 26/736     | 0.004002         | Abhd6/Abr/Adora3/Adtrp/Angpt4/Ccl12/Cd300a/Cdkn1b/Dcn/Dusp10/Dusp22/Dusp3/Epha1/Il1rn/Il33/Kcne3/Krit1/Mctp1/Meox2/Myocd/Pbld1/Sema3f/Sema4a/Sema4c/Sema6c/Stard13 | 26    | 1.961161 |
| BP       | GO:0071222 | cellular response to lipopolysaccharide                                 | 24/736     | 0.004196         | Ccl12/Cxcl5/Defa17/Defa2/Defa21/Defa22/Defa23/Defa24/Defa3/Defa30/Defa31/Defa34/Defa5/Gbp10/Iifng/Il1rn/Ltf/Nlrp3/Nos2/Nr1h2/Pde4d/Plscr2/Sirpa/Spon2              | 24    | 3.265986 |

|    |            |                                                   |        |          |                                                                                                                                                                             |    |           |
|----|------------|---------------------------------------------------|--------|----------|-----------------------------------------------------------------------------------------------------------------------------------------------------------------------------|----|-----------|
| BP | GO:0032496 | response to lipopolysaccharide                    | 28/736 | 0.004196 | Abr/Ccl12/Cxcl5/Defa17/Defa2/Defa21/Defa22/Defa23/Defa24/Defa3/Defa30/Defa31/Defa34/Defa5/Dusp10/Gbp10/Ifng/Il1rn/Ltf/Nlrp3/Nos2/Nr1h2/P2rx7/Pde4d/Plscr2/Ptgfr/Sirpa/Spon2 | 28 | 3.40168   |
| BP | GO:0046578 | regulation of Ras protein signal transduction     | 21/736 | 0.004196 | Abr/Adra1b/Arfgef1/Arhgap24/Arhgef3/Arhgef39/Arpp19/Cyth2/Git1/Gpr35/Igf1/Iqsec2/Itsn2/Kalrn/Mfn2/Ntrk1/Plekhg2/Plekhg5/Rasgef1a/Spata13/Syngap1                            | 21 | -0.654654 |
| BP | GO:0050830 | defense response to Gram-positive bacterium       | 15/736 | 0.004434 | Defa17/Defa2/Defa21/Defa22/Defa23/Defa24/Defa3/Defa30/Defa31/Defa34/Defa5/Gbp10/Lyz1/Nlrp3/P2rx7                                                                            | 15 | 3.356586  |
| BP | GO:0071219 | cellular response to molecule of bacterial origin | 24/736 | 0.005569 | Ccl12/Cxcl5/Defa17/Defa2/Defa21/Defa22/Defa23/Defa24/Defa3/Defa30/Defa31/Defa34/Defa5/Gbp10/Ifng/Il1rn/Ltf/Nlrp3/Nos2/Nr1h2/Pde4d/Plscr2/Sirpa/Spon2                        | 24 | 3.265986  |
| BP | GO:0048511 | rhythmic process                                  | 24/736 | 0.005569 | Arntl/Ciart/Cipc/Cry2/Dbp/Fbxl21/Hlf/Igf1/Mycbp2/Nfkb2/Nos2/Npas2/Nr1d2/Ntrk1/Per1/Per2/Per3/Pgr/Rorc/Sgpl1/Stat5a/Tef/Timeless/Usf2                                        | 24 | 0.816497  |
| BP | GO:0071216 | cellular response to biotic stimulus              | 25/736 | 0.006141 | Bid/Ccl12/Cxcl5/Defa17/Defa2/Defa21/Defa22/Defa23/Defa24/Defa3/Defa30/Defa31/Defa34/Defa5/Gbp10/Ifng/Il1rn/Ltf/Nlrp3/Nos2/Nr1h2/Pde4d/Plscr2/Sirpa/Spon2                    | 25 | 3         |
| BP | GO:0046890 | regulation of lipid biosynthetic process          | 17/736 | 0.006885 | Abhd6/Acadvl/Adgrf5/Cyp17a1/Dhcr7/Gip/Htr2b/Ifng/Igf1/Nr1h2/Ormdl2/Pde8b/Pdk4/Pla2g6/Por/Prkcd/Slc27a1                                                                      | 17 | 1.212678  |
| BP | GO:0002237 | response to molecule of bacterial origin          | 28/736 | 0.006885 | Abr/Ccl12/Cxcl5/Defa17/Defa2/Defa21/Defa22/Defa23/Defa24/Defa3/Defa30/Defa31/Defa34/Defa5/Dusp10/Gbp10/Ifng/Il1rn/Ltf/Nlrp3/Nos2/Nr1h2/P2rx7/Pde4d/Plscr2/Ptgfr/Sirpa/Spon2 | 28 | 3.40168   |
| BP | GO:0019216 | regulation of lipid metabolic process             | 26/736 | 0.006885 | Abhd6/Acadvl/Adgrf5/Apobec1/Cyp17a1/Dhcr7/Fgfr3/Gip/Htr2b/Ifng/Igf1/Mtmt2/Nr1d2/Nr1h2/Nucb2/Ormdl2/Pde8b/Pdk4/Pla2g6/Por/Prkag2/Prkcd/Rorc/Slc27a1/Stat5a/Thrb              | 26 | 1.568929  |
| BP | GO:0001662 | behavioral fear response                          | 9/736  | 0.006885 | Eif4g1/Fbxl20/Gja1/Gng7/Kalrn/Lypd1/Morc1/Npas2/Pde8b                                                                                                                       | 9  | 1         |
| BP | GO:0048871 | multicellular organismal                          | 33/736 | 0.007418 | Abhd6/Acadvl/Adgrf5/Ampd2/Ampd3/Arntl/Bmp8a/                                                                                                                                | 33 | -0.522233 |

|    |            |                                                            |        |          |                                                                                                                                                                     |    |           |
|----|------------|------------------------------------------------------------|--------|----------|---------------------------------------------------------------------------------------------------------------------------------------------------------------------|----|-----------|
|    |            | homeostasis                                                |        |          | Cckar/Col2a1/Coro1a/Cytl1/Dram2/Ehmt1/Eif4g1/Gigyf2/Gja1/Gnas/Il18r1/Il1rn/Irx3/Ldb2/Mfn2/Muc13/Nox4/Nr1d2/Nr1h2/P2rx7/Pbld1/Pdk4/Per2/Ppp1r13l/Slc27a1/Slc28a2     |    |           |
| BP | GO:0002209 | behavioral defense response                                | 9/736  | 0.007418 | Eif4g1/Fbxl20/Gja1/Gng7/Kalrn/Lypd1/Morc1/Npas2/Pde8b                                                                                                               | 9  | 1         |
| BP | GO:0032922 | circadian regulation of gene expression                    | 10/736 | 0.007461 | Arntl/Ciart/Cry2/Mycbp2/Npas2/Per1/Per2/Per3/Rorc/Usp2                                                                                                              | 10 | 1.264911  |
| BP | GO:0043153 | entrainment of circadian clock by photoperiod              | 6/736  | 0.008429 | Cry2/Fbxl21/Per1/Per2/Per3/Usp2                                                                                                                                     | 6  | 1.632993  |
| BP | GO:0035821 | modification of morphology or physiology of other organism | 16/736 | 0.008771 | Anxa2/Cxcl5/Defa17/Defa2/Defa21/Defa22/Defa23/Defa24/Defa3/Defa30/Defa31/Defa34/Defa5/Ifng/Ltf/Nos2                                                                 | 16 | 3         |
| BP | GO:0042596 | fear response                                              | 9/736  | 0.009989 | Eif4g1/Fbxl20/Gja1/Gng7/Kalrn/Lypd1/Morc1/Npas2/Pde8b                                                                                                               | 9  | 1         |
| BP | GO:0009648 | photoperiodism                                             | 6/736  | 0.009989 | Cry2/Fbxl21/Per1/Per2/Per3/Usp2                                                                                                                                     | 6  | 1.632993  |
| BP | GO:0035461 | vitamin transmembrane transport                            | 5/736  | 0.011123 | Slc19a1/Slc19a2/Slc19a3/Slc5a6/Stra6l                                                                                                                               | 5  | 2.236068  |
| BP | GO:0010959 | regulation of metal ion transport                          | 29/736 | 0.012466 | Amigo1/Ank3/Anxa2/Asph/Cckar/Ccl12/Coro1a/Dpp6/G6pdx/Gck/Gja1/Gnas/Gpr35/Ifng/Igf1/Kcne3/Kcnq1/Neto1/Neto2/Nkain4/P2rx7/Pde4d/Per1/Pla2g6/Pln/Sgk1/Tmbim6/Tmc1/Usp2 | 29 | -0.185695 |
| BP | GO:0051056 | regulation of small GTPase mediated signal transduction    | 21/736 | 0.012466 | Abr/Adra1b/Arfgef1/Arhgap24/Arhgef3/Arhgef39/Arpp19/Cyth2/Git1/Gpr35/Igf1/Iqsec2/Itsn2/Kalrn/Mfn2/Ntrk1/Plekhg2/Plekhg5/Rasgef1a/Spata13/Syngap1                    | 21 | -0.654654 |
| BP | GO:0009649 | entrainment of circadian clock                             | 6/736  | 0.014649 | Cry2/Fbxl21/Per1/Per2/Per3/Usp2                                                                                                                                     | 6  | 1.632993  |
| BP | GO:0032651 | regulation of interleukin-1 beta production                | 10/736 | 0.015032 | Casp8/Hk1/Ifi204/Ifi211/Ifng/Igf1/Nlrp3/P2rx7/Sirpa/Tlr8                                                                                                            | 10 | 1.264911  |
| BP | GO:0007623 | circadian rhythm                                           | 18/736 | 0.015449 | Arntl/Ciart/Cipc/Cry2/Dbp/Fbxl21/Igf1/Mycbp2/Nos2/Npas2/Nr1d2/Ntrk1/Per1/Per2/Per3/Rorc/Timeless/Usp2                                                               | 18 | 0.942809  |
| BP | GO:0032731 | positive regulation of                                     | 8/736  | 0.015449 | Casp8/Hk1/Ifi204/Ifi211/Ifng/Nlrp3/P2rx7/Tlr8                                                                                                                       | 8  | 1.414214  |

|                               |            |                                                                             |        |          |                                                                                                                                                                                       |    |           |
|-------------------------------|------------|-----------------------------------------------------------------------------|--------|----------|---------------------------------------------------------------------------------------------------------------------------------------------------------------------------------------|----|-----------|
| interleukin-1 beta production |            |                                                                             |        |          |                                                                                                                                                                                       |    |           |
| BP                            | GO:0015914 | phospholipid transport                                                      | 9/736  | 0.019392 | Abcb1a/Abcb4/Atp11a/Atp8b4/Atp9b/P2rx7/Pltp/Prelid3b/Prkcd                                                                                                                            | 9  | 0.333333  |
| BP                            | GO:0009410 | response to xenobiotic stimulus                                             | 19/736 | 0.019392 | Abcb4/Adgrl3/Adra1b/Akr1c12/Akr1c13/Arnt2/Cyp2j8/Cyp2s1/Cyp46a1/Dlg4/E2f1/Kalrn/Pck1/Pgr/Rorc/Ryr1/Stat5a/Sult1a1/Ugt1a6a                                                             | 19 | 2.064742  |
| BP                            | GO:0045332 | phospholipid translocation                                                  | 6/736  | 0.019392 | Abcb1a/Abcb4/Atp11a/Atp8b4/Atp9b/P2rx7                                                                                                                                                | 6  | 0         |
| BP                            | GO:0040013 | negative regulation of locomotion                                           | 24/736 | 0.019392 | Abhd6/Abr/Adora3/Adtrp/Angpt4/Ccl12/Cd300a/Dcn/Dusp10/Dusp22/Dusp3/Epha1/Il1rn/Il33/Krit1/Mctp1/Meox2/Myocd/Pbld1/Sema3f/Sema4a/Sema4c/Sema6c/Stard13                                 | 24 | 1.632993  |
| BP                            | GO:0046889 | positive regulation of lipid biosynthetic process                           | 11/736 | 0.01956  | Abhd6/Adgrf5/Cyp17a1/Htr2b/Igfbp1/Igf1/Nr1h2/Pla2g6/Por/Prkcd/Slc27a1                                                                                                                 | 11 | 0.904534  |
| BP                            | GO:0002294 | CD4-positive, alpha-beta T cell differentiation involved in immune response | 9/736  | 0.019654 | Foxp1/Igfbp1/Il18r1/Il23a/Il27/Myb/Nlrp3/Rorc/Sema4a                                                                                                                                  | 9  | 2.333333  |
| BP                            | GO:0002293 | alpha-beta T cell differentiation involved in immune response               | 9/736  | 0.02124  | Foxp1/Igfbp1/Il18r1/Il23a/Il27/Myb/Nlrp3/Rorc/Sema4a                                                                                                                                  | 9  | 2.333333  |
| BP                            | GO:0048640 | negative regulation of developmental growth                                 | 13/736 | 0.02124  | Cdkn1b/Dusp10/Fgfr3/Foxp1/G6pdx/Gja1/Gnas/Mag/Sema3f/Sema4a/Sema4c/Sema6c/Spg20                                                                                                       | 13 | 0.27735   |
| BP                            | GO:0034204 | lipid translocation                                                         | 6/736  | 0.02124  | Abcb1a/Abcb4/Atp11a/Atp8b4/Atp9b/P2rx7                                                                                                                                                | 6  | 0         |
| BP                            | GO:0097035 | regulation of membrane lipid distribution                                   | 8/736  | 0.021697 | Abcb1a/Abcb4/Atp11a/Atp8b4/Atp9b/P2rx7/Plscr2/Prkcd                                                                                                                                   | 8  | 0.707107  |
| BP                            | GO:0002287 | alpha-beta T cell activation involved in immune response                    | 9/736  | 0.022369 | Foxp1/Igfbp1/Il18r1/Il23a/Il27/Myb/Nlrp3/Rorc/Sema4a                                                                                                                                  | 9  | 2.333333  |
| BP                            | GO:0007409 | axonogenesis                                                                | 30/736 | 0.024181 | Ablim1/Amigo1/Ank3/Apbb2/Artn/Bsg/Cckar/Chodl/Dab1/Eif4g2/Epha1/Fgfr3/Flrt2/Foxp1/Golga4/Kalrn/Mag/Mapt/Mycbp2/Ntrk1/Numb/Sema3f/Sema4a/Sema4c/Sema6c/Spg20/Syngap1/Trpc5/Tsku/Zswim8 | 30 | -0.365148 |
| BP                            | GO:0015748 | organophosphate ester transport                                             | 10/736 | 0.02497  | Abcb1a/Abcb4/Atp11a/Atp8b4/Atp9b/Gja1/P2rx7/Pltp/Prelid3b/Prkcd                                                                                                                       | 10 | 0.632456  |

|    |            |                                                          |        |          |                                                                                                                                                                                          |    |          |
|----|------------|----------------------------------------------------------|--------|----------|------------------------------------------------------------------------------------------------------------------------------------------------------------------------------------------|----|----------|
| BP | GO:0044419 | interspecies interaction<br>between organisms            | 27/736 | 0.026508 | Anxa2/Cul1/Cxcl5/Defa17/Defa2/Defa21/Defa22/Defa23/Defa24/Defa3/Defa30/Defa31/Defa34/Defa5/Hspd1/Ifitm3/Ifng/Irgm1/Ltf/Nlr1/Nos2/Ppih/Slc20a2/Snx3/Tri<br>m10/Ube2i/Vcam1                | 27 | 2.501851 |
| BP | GO:0045821 | positive regulation of<br>glycolytic process             | 5/736  | 0.030007 | Entpd5/Gck/Ifng/Igf1/P2rx7                                                                                                                                                               | 5  | 0.447214 |
| BP | GO:0032732 | positive regulation of<br>interleukin-1 production       | 8/736  | 0.031913 | Casp8/Hk1/Ifi204/Ifi211/Ifng/Nlrp3/P2rx7/Tlr8                                                                                                                                            | 8  | 1.414214 |
| BP | GO:0000082 | G1/S transition of mitotic cell<br>cycle                 | 15/736 | 0.031913 | Bid/Ccl12/Ccnd2/Ccne1/Cdkn1b/Ctdspl/E2f1/E2f7/Eif4<br>g1/Fbxo7/Gigyf2/Myb/Phf8/Tcf19/Ube2e2                                                                                              | 15 | 2.32379  |
| BP | GO:0030336 | negative regulation of cell<br>migration                 | 20/736 | 0.031913 | Abhd6/Abr/Adora3/Adtrp/Angpt4/Ccl12/Cd300a/Dcn/<br>Dusp10/Dusp22/Dusp3/Epha1/Il1rn/Il33/Krit1/Mctp1/<br>Meox2/Myocd/Pbld1/Stard13                                                        | 20 | 1.341641 |
| BP | GO:0032611 | interleukin-1 beta production                            | 10/736 | 0.031913 | Casp8/Hk1/Ifi204/Ifi211/Ifng/Igf1/Nlrp3/P2rx7/Sirpa/Tl<br>r8                                                                                                                             | 10 | 1.264911 |
| BP | GO:0002292 | T cell differentiation<br>involved in immune<br>response | 9/736  | 0.031913 | Foxp1/Ifng/Il18r1/Il23a/Il27/Myb/Nlrp3/Rorc/Sema4a                                                                                                                                       | 9  | 2.333333 |
| BP | GO:0009166 | nucleotide catabolic process                             | 13/736 | 0.031913 | Art2b/Dera/Enpp5/Entpd5/Gck/Hk1/Ifng/Igf1/Nudt1/P<br>2rx7/Pde4d/Pfkfb2/Prkag2                                                                                                            | 13 | -0.27735 |
| BP | GO:0045666 | positive regulation of neuron<br>differentiation         | 29/736 | 0.031913 | Amigo1/Chodl/Cpeb3/Cxcl5/Dab1/Dlg4/Eif4g1/Eif4g2/<br>Elavl4/Golga4/Heyl/Hmg20b/Ifng/Irx3/Itsn2/Kalrn/Ma<br>pk6/Mapt/Mob2/Ntrk1/Numb/Parp6/Rnf157/Sgk1/Snx<br>3/Styx11/Tgif1/Trpc5/Ube2v2 | 29 | 0.185695 |
| BP | GO:0046434 | organophosphate catabolic<br>process                     | 17/736 | 0.031913 | Abhd6/Art2b/Dera/Enpp5/Entpd5/Gck/Hk1/Ifng/Igf1/I<br>npp5e/Mtmr2/Nudt1/P2rx7/Pde4d/Pfkfb2/Prkag2/Prkc<br>d                                                                               | 17 | 0.727607 |
| BP | GO:0030813 | positive regulation of<br>nucleotide catabolic process   | 5/736  | 0.032174 | Entpd5/Gck/Ifng/Igf1/P2rx7                                                                                                                                                               | 5  | 0.447214 |
| BP | GO:0051197 | positive regulation of<br>coenzyme metabolic process     | 5/736  | 0.032174 | Entpd5/Gck/Ifng/Igf1/P2rx7                                                                                                                                                               | 5  | 0.447214 |
| BP | GO:0032102 | negative regulation of<br>response to external stimulus  | 23/736 | 0.037025 | Abr/Adtrp/Anxa2/Ccl12/Cdkn1b/Chid1/Dusp10/Dusp<br>3/Ets1/Gja1/Igf1/Ltf/Nlrp3/Nlr1/Nr1d2/Nucb2/Prkcd/                                                                                     | 23 | 1.459601 |

|    |            |                                                                                 |        |          |                                                                                                                                                                           |    |          |
|----|------------|---------------------------------------------------------------------------------|--------|----------|---------------------------------------------------------------------------------------------------------------------------------------------------------------------------|----|----------|
| BP | GO:0042752 | regulation of circadian rhythm                                                  | 12/736 | 0.037557 | Sema3f/Sema4a/Sema4c/Sema6c/Sirpa/Tfpi<br>Arntl/Cipc/Cry2/Fbxl21/Npas2/Nr1d2/Per1/Per2/Per3/<br>Rorc/Timeless/Usp2                                                        | 12 | 1.732051 |
| BP | GO:0034248 | regulation of cellular amide metabolic process                                  | 25/736 | 0.040472 | Cnot2/Cnot6l/Cnot8/Cpeb3/Eif4ebp3/Eif4g1/Eif4g2/Ela<br>vl4/Gigyf2/Iifng/Igf1/Inpp5e/Kbtbd8/Larp4b/Mif4gd/Or<br>mdl2/Pdk4/Per1/Per2/Pla2g6/Prkcd/Pstk/Rbm3/Samd4/<br>Spon1 | 25 | 2.2      |
| BP | GO:0009142 | nucleoside triphosphate biosynthetic process                                    | 14/736 | 0.042653 | Adk/Atp5c1/Atp5h/Cad/Ctps2/Entpd5/Gck/Hk1/Iifng/I<br>gf1/Nme4/P2rx7/Pfkfb2/Prkag2                                                                                         | 14 | 0.534522 |
| BP | GO:0032652 | regulation of interleukin-1 production                                          | 10/736 | 0.043391 | Casp8/Hk1/Ifi204/Ifi211/Iifng/Igf1/Nlrp3/P2rx7/Sirpa/Tl<br>r8                                                                                                             | 10 | 1.264911 |
| BP | GO:0046390 | ribose phosphate biosynthetic process                                           | 18/736 | 0.045641 | Ampd2/Ampd3/Aprt/Atp5c1/Atp5h/Cad/Ctps2/Entpd<br>5/G6pdx/Gck/Hk1/Iifng/Igf1/Nme4/P2rx7/Pdk4/Pfkfb2/<br>Prkag2                                                             | 18 | 0.942809 |
| BP | GO:0008202 | steroid metabolic process                                                       | 21/736 | 0.045715 | Acadvl/Akr1c12/Akr1c13/Akr1c14/Cel/Cyp17a1/Cyp3a<br>25/Cyp46a1/Dhcr7/G6pdx/Hsd17b2/Iifng/Igf1/Pde8b/P<br>or/Rorc/Sgpl1/Stat5a/Sult1a1/Sult2b1/Thrb                        | 21 | 1.963961 |
| BP | GO:2000146 | negative regulation of cell motility                                            | 20/736 | 0.046784 | Abhd6/Abr/Adora3/Adtrp/Angpt4/Ccl12/Cd300a/Dcn/<br>Dusp10/Dusp22/Dusp3/Epha1/Il1rn/Il33/Krit1/Mctp1/<br>Meox2/Myocd/Pbld1/Stard13                                         | 20 | 1.341641 |
| BP | GO:0044262 | cellular carbohydrate metabolic process                                         | 20/736 | 0.051949 | Adra1b/Arpp19/B3gnt8/Extl2/Gaa/Gck/Gnptg/Hk1/Igf<br>1/Inpp5e/Itpk1/Mtmr2/Pck1/Pdk4/Per2/Pfkfb2/Plcd1/P<br>omc/Prkag2/Rorc                                                 | 20 | 1.341641 |
| BP | GO:1903039 | positive regulation of leukocyte cell-cell adhesion regulation of establishment | 16/736 | 0.051949 | Adk/Coro1a/Dusp10/Ets1/Hspd1/Iifng/Igf1/Il23a/Myb/<br>Nlrp3/Sirpa/Spta1/Stat5a/Vcam1/Zap70/Zbtb16                                                                         | 16 | 1        |
| BP | GO:0032878 | or maintenance of cell polarity                                                 | 5/736  | 0.052027 | Arfgef1/Bcas3/Igf1/Krit1/Wdpcp                                                                                                                                            | 5  | 0.447214 |
| BP | GO:0042093 | T-helper cell differentiation                                                   | 8/736  | 0.052027 | Foxp1/Il18r1/Il23a/Il27/Myb/Nlrp3/Rorc/Sema4a                                                                                                                             | 8  | 2.12132  |
| BP | GO:0009165 | nucleotide biosynthetic process                                                 | 20/736 | 0.052027 | Adk/Ampd2/Ampd3/Aprt/Atp5c1/Atp5h/Cad/Ctps2/E<br>ntpd5/G6pdx/Gck/Hk1/Iifng/Igf1/Nme4/Nos2/P2rx7/Pd<br>k4/Pfkfb2/Prkag2                                                    | 20 | 0.447214 |
| BP | GO:0044843 | cell cycle G1/S phase                                                           | 15/736 | 0.052547 | Bid/Ccl12/Ccnd2/Ccne1/Cdkn1b/Ctdspl/E2f1/E2f7/Eif4                                                                                                                        | 15 | 2.32379  |

|    |            |                                                                                       |        |          |                                                                                                                                                                        |    |           |
|----|------------|---------------------------------------------------------------------------------------|--------|----------|------------------------------------------------------------------------------------------------------------------------------------------------------------------------|----|-----------|
| BP | GO:0046632 | transition<br>alpha-beta T cell<br>differentiation                                    | 11/736 | 0.052547 | g1/Fbxo7/Gigyf2/Myb/Phf8/Tcf19/Ube2e2<br>Foxp1/Ifng/Il18r1/Il23a/Il27/Myb/Nlrp3/Rorc/Sema4a/<br>Zap70/Zbtb16                                                           | 11 | 2.110579  |
| BP | GO:0050770 | regulation of axonogenesis                                                            | 16/736 | 0.052547 | Amigo1/Chodl/Dab1/Eif4g2/Golga4/Mag/Mapt/Mycbp<br>2/Sema3f/Sema4a/Sema4c/Sema6c/Spg20/Syngap1/Trp<br>c5/Zswim8                                                         | 16 | 0         |
| BP | GO:1901292 | nucleoside phosphate<br>catabolic process                                             | 13/736 | 0.052547 | Art2b/Dera/Enpp5/Entpd5/Gck/Hk1/Ifng/Igf1/Nudt1/P<br>2rx7/Pde4d/Pfkfb2/Prkag2                                                                                          | 13 | -0.27735  |
| BP | GO:1903037 | regulation of leukocyte cell-<br>cell adhesion                                        | 20/736 | 0.052547 | Adk/Adtrp/Cd300a/Coro1a/Dusp10/Dusp22/Dusp3/Et<br>s1/Hspd1/Ifng/Igf1/Il23a/Myb/Nlrp3/Sirpa/Spta1/Stat5<br>a/Vcam1/Zap70/Zbtb16                                         | 20 | 0.447214  |
| BP | GO:0009914 | hormone transport                                                                     | 24/736 | 0.052547 | Abcb1a/Adora3/Arntl/Bmp8a/Cckar/Cry2/Gck/Gip/Gja<br>1/Gnas/Ifng/Il1rn/Kalrn/Kcnq1/Ly6e/Nnat/Nos2/Nucb<br>2/Pde8b/Per2/Pfkfb2/Pla2g6/Pomc/Ttr                           | 24 | 1.224745  |
| BP | GO:0050870 | positive regulation of T cell<br>activation                                           | 15/736 | 0.054166 | Adk/Coro1a/Dusp10/Hspd1/Ifng/Igf1/Il23a/Myb/Nlrp3<br>/Sirpa/Spta1/Stat5a/Vcam1/Zap70/Zbtb16                                                                            | 15 | 0.774597  |
| BP | GO:0002697 | regulation of immune<br>effector process                                              | 26/736 | 0.054166 | Abr/Adora3/Cd300a/Cd55/Cxcl5/Dusp10/Dusp22/Fcgr<br>1/Foxp1/H2-T22/H2-<br>T3/Hk1/Hspd1/Ifng/Il18r1/Il23a/Il27/Il33/Myb/Myo18a<br>/Nlrp3/Nlrp1/P2rx7/Spon2/Stat5a/Tmbim6 | 26 | 1.176697  |
| BP | GO:0030810 | positive regulation of<br>nucleotide biosynthetic<br>process                          | 6/736  | 0.054166 | Entpd5/Gck/Ifng/Igf1/Nos2/P2rx7                                                                                                                                        | 6  | 0         |
| BP | GO:0033144 | negative regulation of<br>intracellular steroid hormone<br>receptor signaling pathway | 6/736  | 0.054166 | Arntl/Cnot2/Cry2/Heyl/Igf1/Per1                                                                                                                                        | 6  | -0.816497 |
| BP | GO:1900373 | positive regulation of purine<br>nucleotide biosynthetic<br>process                   | 6/736  | 0.054166 | Entpd5/Gck/Ifng/Igf1/Nos2/P2rx7                                                                                                                                        | 6  | 0         |
| BP | GO:0009201 | ribonucleoside triphosphate<br>biosynthetic process                                   | 13/736 | 0.054166 | Atp5c1/Atp5h/Cad/Ctps2/Entpd5/Gck/Hk1/Ifng/Igf1/N<br>me4/P2rx7/Pfkfb2/Prkag2                                                                                           | 13 | 0.83205   |
| BP | GO:2000045 | regulation of G1/S transition<br>of mitotic cell cycle                                | 11/736 | 0.054166 | Bid/Ccl12/Ccnd2/Ccne1/Ctdspl/E2f1/E2f7/Eif4g1/Fbxo7<br>/Gigyf2/Ube2e2                                                                                                  | 11 | 1.507557  |

|    |            |                                                       |        |          |                                                                                                                                                                |    |          |
|----|------------|-------------------------------------------------------|--------|----------|----------------------------------------------------------------------------------------------------------------------------------------------------------------|----|----------|
| BP | GO:0031331 | positive regulation of cellular catabolic process     | 23/736 | 0.055208 | Adra1b/Atxn3/Aurka/Bid/Cnot6l/Cnot8/Cpeb3/Dcn/Entpd5/Fbxo7/Gck/Gigyf2/Git1/Herpud1/Ifng/Igf1/Il33/Irgm1/Mfn2/P2rx7/Prkcd/Ube2v2/Wac                            | 23 | 0.625543 |
| BP | GO:0043367 | CD4-positive, alpha-beta T cell differentiation       | 9/736  | 0.055208 | Foxp1/Ifng/Il18r1/Il23a/Il27/Myb/Nlrp3/Rorc/Sema4a                                                                                                             | 9  | 2.333333 |
| BP | GO:1901293 | nucleoside phosphate biosynthetic process             | 20/736 | 0.055338 | Adk/Ampd2/Ampd3/Aprt/Atp5c1/Atp5h/Cad/Ctps2/Entpd5/G6pdx/Gck/Hk1/Ifng/Igf1/Nme4/Nos2/P2rx7/Pdk4/Pfkfb2/Prkag2                                                  | 20 | 0.447214 |
| BP | GO:0033555 | multicellular organismal response to stress           | 10/736 | 0.061115 | Eif4g1/Fbxl20/Gja1/Gng7/Kalrn/Lypd1/Morc1/Npas2/Ntrk1/Pde8b                                                                                                    | 10 | 0.632456 |
| BP | GO:0050771 | negative regulation of axonogenesis                   | 8/736  | 0.061584 | Dab1/Mag/Sema3f/Sema4a/Sema4c/Sema6c/Spig20/Syn gap1                                                                                                           | 8  | 0        |
| BP | GO:0009260 | ribonucleotide biosynthetic process                   | 17/736 | 0.061584 | Ampd2/Ampd3/Aprt/Atp5c1/Atp5h/Cad/Ctps2/Entpd5/Gck/Hk1/Ifng/Igf1/Nme4/P2rx7/Pdk4/Pfkfb2/Prkag2                                                                 | 17 | 1.212678 |
| BP | GO:1903531 | negative regulation of secretion by cell              | 17/736 | 0.061584 | Abr/Adtrp/Bmp8a/Cd300a/Cry2/Erp29/Gck/Il1rn/Il33/Kalrn/Kcnq1/Nlrp3/Nucb2/Pde8b/Tcp11/Tlr8/Tmbim6                                                               | 17 | 1.212678 |
| BP | GO:0035710 | CD4-positive, alpha-beta T cell activation            | 10/736 | 0.063267 | Cdh26/Foxp1/Ifng/Il18r1/Il23a/Il27/Myb/Nlrp3/Rorc/Sema4a                                                                                                       | 10 | 1.897367 |
| BP | GO:0007626 | locomotory behavior                                   | 18/736 | 0.063665 | Adgrl3/Adra1b/Ccnd2/Ciart/Dab1/Dlg4/Dmrt3/Elavl4/Espn/Gaa/Gigyf2/Gip/Gng7/Kalrn/Lgi4/Mapt/Npas2/Usps2                                                          | 18 | 0        |
| BP | GO:0097009 | energy homeostasis                                    | 6/736  | 0.063665 | Ampd2/Ampd3/Bmp8a/Eif4g1/Irx3/Nr1d2                                                                                                                            | 6  | 0        |
| BP | GO:0010256 | endomembrane system organization                      | 24/736 | 0.063665 | Acrbp/Ank3/Arfgef1/Atp8b4/Bcas3/Camsap3/Col5a1/Dctn1/Dnajc13/Myo18a/Nsfl1c/Nup93/P2rx7/Parp11/Plscr2/Prkcd/Snx3/Spta1/Stx16/Stx18/Tor1aip2/Trappc12/Ubl4a/Vmp1 | 24 | 0.408248 |
| BP | GO:0046835 | carbohydrate phosphorylation                          | 4/736  | 0.063665 | Gck/Gnptg/Hk1/Itpk1                                                                                                                                            | 4  | 1        |
| BP | GO:0045913 | positive regulation of carbohydrate metabolic process | 9/736  | 0.063835 | Adra1b/Arpp19/Entpd5/Gck/Ifng/Igf1/P2rx7/Pfkfb2/Plcd1                                                                                                          | 9  | 0.333333 |
| BP | GO:0009163 | nucleoside biosynthetic process                       | 5/736  | 0.065651 | Adk/Aprt/Cad/Ctps2/Nme4                                                                                                                                        | 5  | 1.341641 |



|    |            |                                                          |        |          |                                                                                                                 |    |          |
|----|------------|----------------------------------------------------------|--------|----------|-----------------------------------------------------------------------------------------------------------------|----|----------|
| BP | GO:0042455 | ribonucleoside biosynthetic process                      | 5/736  | 0.065651 | Adk/Aprt/Cad/Ctps2/Nme4                                                                                         | 5  | 1.341641 |
| BP | GO:0019218 | regulation of steroid metabolic process                  | 10/736 | 0.06734  | Acadv1/Cyp17a1/Dhcr7/Ifng/Igf1/Pde8b/Por/Rorc/Stat5a/Thrb                                                       | 10 | 1.264911 |
| BP | GO:0032370 | positive regulation of lipid transport                   | 8/736  | 0.06734  | Abcb4/Anxa2/Nr1h2/Nucb2/P2rx7/Pla2g6/Pltp/Prkcd                                                                 | 8  | 0        |
| BP | GO:0045834 | positive regulation of lipid metabolic process           | 13/736 | 0.067526 | Abhd6/Adgrf5/Cyp17a1/Fgfr3/Htr2b/Ifng/Igf1/Nr1h2/Nucb2/Pla2g6/Por/Prkcd/Slc27a1                                 | 13 | 0.83205  |
| BP | GO:0046631 | alpha-beta T cell activation                             | 13/736 | 0.067526 | Cd300a/Cdh26/Foxp1/Ifng/Il18r1/Il23a/Il27/Myb/Nlrp3/Rorc/Sema4a/Zap70/Zbtb16                                    | 13 | 1.941451 |
| BP | GO:0008654 | phospholipid biosynthetic process                        | 13/736 | 0.06955  | Adgrf5/Agpat1/Agpat4/Chkb/Far1/Htr2b/Idi1/Lclat1/Pgap2/Pigp/Pik3cd/Pla2g6/Slc27a1                               | 13 | 1.38675  |
| BP | GO:0009127 | purine nucleoside monophosphate biosynthetic process     | 13/736 | 0.06955  | Ampd2/Ampd3/Aprt/Atp5c1/Atp5h/Entpd5/Gck/Hk1/Igng/Igf1/P2rx7/Pfkfb2/Prkag2                                      | 13 | 0.27735  |
| BP | GO:0009168 | purine ribonucleoside monophosphate biosynthetic process | 13/736 | 0.06955  | Ampd2/Ampd3/Aprt/Atp5c1/Atp5h/Entpd5/Gck/Hk1/Igng/Igf1/P2rx7/Pfkfb2/Prkag2                                      | 13 | 0.27735  |
| BP | GO:0002699 | positive regulation of immune effector process           | 18/736 | 0.069773 | Adora3/Cd300a/Fcgr1/Foxp1/H2-T22/H2-T3/Hk1/Hspd1/Ifng/Il18r1/Il23a/Il33/Myb/Myo18a/Nlrp3/P2rx7/Spon2/Stat5a     | 18 | 1.414214 |
| BP | GO:0042445 | hormone metabolic process                                | 16/736 | 0.070276 | Akr1c14/Awat2/Cyp17a1/Cyp2s1/Cyp46a1/Dhcr7/Dio1/Hsd17b2/Ifng/Igf1/Pde8b/Por/Sgpl1/Slco4a1/Sult1a1/Tr            | 16 | 2        |
| BP | GO:0043470 | regulation of carbohydrate catabolic process             | 7/736  | 0.070276 | Adra1b/Entpd5/Gck/Ifng/Igf1/P2rx7/Prkag2                                                                        | 7  | 0.377964 |
| BP | GO:0051194 | positive regulation of cofactor metabolic process        | 5/736  | 0.070276 | Entpd5/Gck/Ifng/Igf1/P2rx7                                                                                      | 5  | 0.447214 |
| BP | GO:0048588 | developmental cell growth                                | 18/736 | 0.070276 | Adra1b/Aurka/Eif4g2/Foxp1/G6pdx/Golga4/Igf1/Itsn2/Mag/Mapt/Myocd/Rnf157/Sema3f/Sema4a/Sema4c/Sema6c/Spg20/Trpc5 | 18 | 1.885618 |
| BP | GO:0032612 | interleukin-1 production                                 | 10/736 | 0.070537 | Casp8/Hk1/Ifi204/Ifi211/Ifng/Igf1/Nlrp3/P2rx7/Sirpa/Tlr8                                                        | 10 | 1.264911 |

|    |            |                                                                                          |        |          |                                                                                                                                                                    |    |           |
|----|------------|------------------------------------------------------------------------------------------|--------|----------|--------------------------------------------------------------------------------------------------------------------------------------------------------------------|----|-----------|
| BP | GO:0006164 | purine nucleotide biosynthetic process                                                   | 17/736 | 0.071348 | Adk/Ampd2/Ampd3/Aprt/Atp5c1/Atp5h/Entpd5/Gck/Hk1/Ifng/Igf1/Nme4/Nos2/P2rx7/Pdk4/Pfkfb2/Prkag2                                                                      | 17 | 0.242536  |
| BP | GO:0051048 | negative regulation of secretion                                                         | 18/736 | 0.071348 | Abr/Adtrp/Bmp8a/Cd300a/Cry2/Erp29/Gck/Gnas/Il1rn/Il33/Kalrn/Kcnq1/Nlrp3/Nucb2/Pde8b/Tcp11/Tlr8/Tmbim6                                                              | 18 | 0.942809  |
| BP | GO:0050863 | regulation of T cell activation                                                          | 20/736 | 0.071348 | Adk/Cd300a/Coro1a/Dusp10/Dusp22/Dusp3/Hspd1/Ifng/Igf1/Il23a/Il27/Myb/Nlrp3/Rorc/Sirpa/Spta1/Stat5a/Vcam1/Zap70/Zbtb16                                              | 20 | 0.894427  |
| BP | GO:0051196 | regulation of coenzyme metabolic process                                                 | 7/736  | 0.073959 | Entpd5/Gck/Ifng/Igf1/P2rx7/Pdk4/Prkag2                                                                                                                             | 7  | 0.377964  |
| BP | GO:0006112 | energy reserve metabolic process                                                         | 9/736  | 0.073959 | Adgrf5/Adra1b/Gaa/Gck/Gnas/Igf1/Per2/Pomc/Prkag2                                                                                                                   | 9  | -0.333333 |
| BP | GO:0022409 | positive regulation of cell-cell adhesion                                                | 17/736 | 0.075354 | Adk/Ank3/Coro1a/Dusp10/Ets1/Hspd1/Ifng/Igf1/Il23a/Myb/Nlrp3/Sirpa/Spta1/Stat5a/Vcam1/Zap70/Zbtb16                                                                  | 17 | 0.727607  |
| BP | GO:1902235 | regulation of endoplasmic reticulum stress-induced intrinsic apoptotic signaling pathway | 5/736  | 0.076752 | Bok/Erp29/Herpud1/Rnf183/Tmbim6                                                                                                                                    | 5  | -1.341641 |
| BP | GO:0009156 | ribonucleoside monophosphate biosynthetic process                                        | 13/736 | 0.077131 | Ampd2/Ampd3/Aprt/Atp5c1/Atp5h/Entpd5/Gck/Hk1/Ifng/Igf1/P2rx7/Pfkfb2/Prkag2                                                                                         | 13 | 0.27735   |
| BP | GO:0031346 | positive regulation of cell projection organization                                      | 27/736 | 0.078467 | Amigo1/Arap1/Bcas3/Cep135/Chodl/Cpeb3/Cxcl5/Dlg4/Eif4g2/Elavl4/Espn/Golga4/Itsn2/Kalrn/Mapk6/Mapt/Mob2/Ntrk1/Numb/P2rx7/Parp6/Rnf157/Sgk1/Snx3/Styx11/Trpc5/Ube2v2 | 27 | 0.19245   |
| BP | GO:0006869 | lipid transport                                                                          | 21/736 | 0.078594 | Abcb1a/Abcb4/Anxa2/Atp11a/Atp8b4/Atp9b/Cry2/Gulp1/Nme4/Nos2/Nr1h2/Nucb2/P2rx7/Pla2g6/Plin2/Pltp/Pomc/Prelid3b/Prkcd/Slc27a1/Stra6l                                 | 21 | 1.963961  |
| BP | GO:0043094 | cellular metabolic compound salvage                                                      | 4/736  | 0.08014  | Adk/Ampd2/Ampd3/Aprt                                                                                                                                               | 4  | 0         |
| BP | GO:0072522 | purine-containing compound biosynthetic process                                          | 17/736 | 0.081497 | Adk/Ampd2/Ampd3/Aprt/Atp5c1/Atp5h/Entpd5/Gck/Hk1/Ifng/Igf1/Nme4/Nos2/P2rx7/Pdk4/Pfkfb2/Prkag2                                                                      | 17 | 0.242536  |
| BP | GO:0009896 | positive regulation of                                                                   | 25/736 | 0.081497 | Adra1b/Atxn3/Aurka/Bid/Cnot6l/Cnot8/Cpeb3/Dcn/En                                                                                                                   | 25 | 0.6       |

|    |            |                                                                    |        |          |                                                                                                                                                     |    |           |
|----|------------|--------------------------------------------------------------------|--------|----------|-----------------------------------------------------------------------------------------------------------------------------------------------------|----|-----------|
|    |            | catabolic process                                                  |        |          | tpd5/Fbxo7/Gck/Gigyf2/Git1/Gja1/Gpc3/Herpud1/Ifng/Igf1/Il33/Irgm1/Mfn2/P2rx7/Prkcd/Ube2v2/Wac                                                       |    |           |
| BP | GO:0006643 | membrane lipid metabolic process                                   | 13/736 | 0.081998 | Cel/Cerk/Fam57b/Hacd4/Map7/Ormdl2/P2rx7/Pgap2/Pigp/Pla2g6/Prkcd/Sgpl1/St3gal4                                                                       | 13 | 1.941451  |
| BP | GO:0010043 | response to zinc ion                                               | 5/736  | 0.083477 | Mt1/Mt2/P2rx7/Pln/Slc30a2                                                                                                                           | 5  | 1.341641  |
| BP | GO:0002532 | production of molecular mediator involved in inflammatory response | 8/736  | 0.083477 | Adora3/Cd300a/Chid1/Dusp10/Il17c/Nos2/Per1/Sirpa                                                                                                    | 8  | 0.707107  |
| BP | GO:0048638 | regulation of developmental growth                                 | 24/736 | 0.083477 | Cdkn1b/Dusp10/Eif4g2/Fgf9/Fgfr3/Foxp1/G6pdx/Gja1/Gnas/Golga4/Igf1/Itsn2/Mag/Mapt/Por/Rnf157/Sema3f/Sema4a/Sema4c/Sema6c/Sgpl1/Spg20/Stat5a/Trpc5    | 24 | 1.224745  |
| BP | GO:0031345 | negative regulation of cell projection organization                | 15/736 | 0.083477 | Arhgap24/Cep97/Cyth2/Dab1/Fat3/Mag/Prkcd/Sema3f/Sema4a/Sema4c/Sema6c/Spg20/Syngap1/Tbx6/Trpc5                                                       | 15 | -0.258199 |
| BP | GO:0044772 | mitotic cell cycle phase transition                                | 22/736 | 0.083477 | Abcb1a/Arpp19/Bid/Ccl12/Ccnd2/Ccne1/Cdkn1b/Chk1/Ctdspl/Donson/E2f1/E2f7/Eif4g1/Fbxl12/Fbxo7/Gigyf2/Kat14/Myb/Npm2/Phf8/Tcf19/Ube2e2                 | 22 | 2.558409  |
| BP | GO:0034655 | nucleobase-containing compound catabolic process                   | 25/736 | 0.083477 | Apobec1/Art2b/Axin2/Cnot6l/Cnot8/Cpeb3/Dera/E2f1/Elavl4/Enpp5/Entpd5/Gck/Gigyf2/Hk1/Ifng/Igf1/Nudt1/Oas2/P2rx7/Pde4d/Pfkfb2/Pkp1/Prkag2/Rbm8a/Samd4 | 25 | 1         |
| BP | GO:0045806 | negative regulation of endocytosis                                 | 7/736  | 0.083477 | Cd300a/Dlg4/Mctp1/Mtmr2/Nr1h2/Sirpa/Snx3                                                                                                            | 7  | 1.133893  |
| BP | GO:0030808 | regulation of nucleotide biosynthetic process                      | 8/736  | 0.083477 | Entpd5/Gck/Ifng/Igf1/Nos2/P2rx7/Pdk4/Prkag2                                                                                                         | 8  | 0         |
| BP | GO:0042446 | hormone biosynthetic process                                       | 8/736  | 0.083477 | Cyp17a1/Dhcr7/Dio1/Hsd17b2/Ifng/Igf1/Pde8b/Por                                                                                                      | 8  | 0         |
| BP | GO:1900371 | regulation of purine nucleotide biosynthetic process               | 8/736  | 0.083477 | Entpd5/Gck/Ifng/Igf1/Nos2/P2rx7/Pdk4/Prkag2                                                                                                         | 8  | 0         |
| BP | GO:1902806 | regulation of cell cycle G1/S phase transition                     | 11/736 | 0.083477 | Bid/Ccl12/Ccnd2/Ccne1/Ctdspl/E2f1/E2f7/Eif4g1/Fbxo7/Gigyf2/Ube2e2                                                                                   | 11 | 1.507557  |
| BP | GO:0019693 | ribose phosphate metabolic process                                 | 26/736 | 0.083477 | Acsm5/Ampd2/Ampd3/Aprt/Atp5c1/Atp5h/Bid/Cad/Ctps2/Entpd5/Far1/G6pdx/Gck/Glyat/H6pd/Hk1/Ifng/Ig                                                      | 26 | 1.568929  |

|    |            |                                                           |        |          |                                                                                                                                                                       |    |          |
|----|------------|-----------------------------------------------------------|--------|----------|-----------------------------------------------------------------------------------------------------------------------------------------------------------------------|----|----------|
|    |            |                                                           |        |          | f1/Ndufv2/Nme4/P2rx7/Pde4d/Pdk4/Pfkfb2/Prkag2/Su<br>lt2b1                                                                                                             |    |          |
| BP | GO:1901657 | glycosyl compound<br>metabolic process                    | 10/736 | 0.083477 | Adk/Akr1b8/Akr1c14/Ampd2/Ampd3/Aprt/Cad/Ctps2<br>/Dera/Nme4                                                                                                           | 10 | 1.264911 |
| BP | GO:0090276 | regulation of peptide<br>hormone secretion                | 16/736 | 0.083477 | Arntl/Bmp8a/Cckar/Gck/Gip/Gja1/Ifng/Kalrn/Kcnq1/N<br>nat/Nos2/Nucb2/Pde8b/Per2/Pfkfb2/Pla2g6                                                                          | 16 | 0.5      |
| BP | GO:0062012 | regulation of small molecule<br>metabolic process         | 22/736 | 0.083477 | Acadvl/Adra1b/Arpp19/Dhcr7/Entpd5/Gck/Gip/Ifng/I<br>gf1/Nos2/Nr1h2/Nucb2/P2rx7/Pdk4/Pfkfb2/Plcd1/Pom<br>c/Por/Prkag2/Rorc/Sirt5/Thrb                                  | 22 | 1.279204 |
| BP | GO:0032011 | ARF protein signal<br>transduction                        | 4/736  | 0.083477 | Arfgef1/Cyth2/Git1/Iqsec2                                                                                                                                             | 4  | -1       |
| BP | GO:0032012 | regulation of ARF protein<br>signal transduction          | 4/736  | 0.083477 | Arfgef1/Cyth2/Git1/Iqsec2                                                                                                                                             | 4  | -1       |
| BP | GO:0046886 | positive regulation of<br>hormone biosynthetic<br>process | 4/736  | 0.083477 | Cyp17a1/Ifng/Igf1/Por                                                                                                                                                 | 4  | 0        |
| BP | GO:0090030 | regulation of steroid<br>hormone biosynthetic<br>process  | 4/736  | 0.083477 | Cyp17a1/Igf1/Pde8b/Por                                                                                                                                                | 4  | 0        |
| BP | GO:2000114 | regulation of establishment<br>of cell polarity           | 4/736  | 0.083477 | Arfgef1/Bcas3/Krit1/Wdpcp                                                                                                                                             | 4  | 1        |
| BP | GO:0042742 | defense response to<br>bacterium                          | 25/736 | 0.083477 | Cxcl5/Defa17/Defa2/Defa21/Defa22/Defa23/Defa24/Def<br>a3/Defa30/Defa31/Defa34/Defa5/Fcgr1/Gbp10/Ifng/Iigp<br>1/Il23a/Ltf/Lyz1/Nlrp3/Nos2/P2rx7/Pla2g6/Prkcd/Spon<br>2 | 25 | 3.8      |
| BP | GO:0050718 | positive regulation of<br>interleukin-1 beta secretion    | 5/736  | 0.083477 | Hk1/Ifng/Nlrp3/P2rx7/Tlr8                                                                                                                                             | 5  | 1.341641 |
| BP | GO:1901659 | glycosyl compound<br>biosynthetic process                 | 5/736  | 0.083477 | Adk/Aprt/Cad/Ctps2/Nme4                                                                                                                                               | 5  | 1.341641 |
| BP | GO:0009145 | purine nucleoside<br>triphosphate biosynthetic<br>process | 12/736 | 0.083477 | Adk/Atp5c1/Atp5h/Entpd5/Gck/Hk1/Ifng/Igf1/Nme4/P<br>2rx7/Pfkfb2/Prkag2                                                                                                | 12 | 0        |
| BP | GO:0009124 | nucleoside monophosphate                                  | 13/736 | 0.084008 | Ampd2/Ampd3/Aprt/Atp5c1/Atp5h/Entpd5/Gck/Hk1/I                                                                                                                        | 13 | 0.27735  |

|    |            |                                                             |        |          |                                                                                                                                      |    |          |
|----|------------|-------------------------------------------------------------|--------|----------|--------------------------------------------------------------------------------------------------------------------------------------|----|----------|
|    |            | biosynthetic process                                        |        |          | fng/Igf1/P2rx7/Pfkfb2/Prkag2                                                                                                         |    |          |
| BP | GO:2001257 | regulation of cation channel activity                       | 13/736 | 0.084008 | Amigo1/Ank3/Asph/Dlg4/Gpr35/Ifng/Kcne3/Kcnq1/Neto1/Neto2/Pde4d/Pla2g6/Pln                                                            | 13 | 0.27735  |
| BP | GO:0032409 | regulation of transporter activity                          | 18/736 | 0.084008 | Abcb1a/Amigo1/Ank3/Asph/Dlg4/Gja1/Gopc/Gpr35/Hk1/Ifng/Kcne3/Kcnq1/Neto1/Neto2/Pde4d/Pla2g6/Pln/Prkcd                                 | 18 | 0.942809 |
| BP | GO:0003254 | regulation of membrane depolarization                       | 6/736  | 0.0847   | Ank3/Bok/Dcn/Gja1/Hsh2d/P2rx7                                                                                                        | 6  | 0        |
| BP | GO:0010976 | positive regulation of neuron projection development        | 22/736 | 0.087006 | Amigo1/Chodl/Cpeb3/Cxcl5/Dlg4/Eif4g2/Elavl4/Golga4/Itsn2/Kalrn/Mapk6/Mapt/Mob2/Ntrk1/Numb/Parp6/Rnf157/Sgk1/Snx3/Styx11/Trpc5/Ube2v2 | 22 | 0.426401 |
| BP | GO:0007589 | body fluid secretion                                        | 10/736 | 0.088554 | Adora3/Anxa2/Aprt/Cckar/Cel/Gja1/Kalrn/Nr1h2/Oas2/Stat5a                                                                             | 10 | 1.264911 |
| BP | GO:0008360 | regulation of cell shape                                    | 12/736 | 0.089172 | Anxa7/Arap1/Arhgap15/Ccl12/Ccl24/Coro1a/Epb41l2/Fmn12/Sema4a/Spr2a1/Spta1/Syne3                                                      | 12 | -0.57735 |
| BP | GO:0007159 | leukocyte cell-cell adhesion                                | 20/736 | 0.089322 | Adk/Adtrp/Cd300a/Coro1a/Dusp10/Dusp22/Dusp3/Ets1/Hspd1/Ifng/Igf1/Il23a/Myb/Nlrp3/Sirpa/Spta1/Stat5a/Vcam1/Zap70/Zbtb16               | 20 | 0.447214 |
| BP | GO:0051180 | vitamin transport                                           | 5/736  | 0.089322 | Slc19a1/Slc19a2/Slc19a3/Slc5a6/Stra6l                                                                                                | 5  | 2.236068 |
| BP | GO:2001171 | positive regulation of ATP biosynthetic process             | 5/736  | 0.089322 | Entpd5/Gck/Ifng/Igf1/P2rx7                                                                                                           | 5  | 0.447214 |
| BP | GO:0006110 | regulation of glycolytic process                            | 6/736  | 0.089322 | Entpd5/Gck/Ifng/Igf1/P2rx7/Prkag2                                                                                                    | 6  | 0        |
| BP | GO:0030811 | regulation of nucleotide catabolic process                  | 6/736  | 0.089322 | Entpd5/Gck/Ifng/Igf1/P2rx7/Prkag2                                                                                                    | 6  | 0        |
| BP | GO:1902667 | regulation of axon guidance                                 | 6/736  | 0.089322 | Mycbp2/Sema3f/Sema4a/Sema4c/Sema6c/Zswim8                                                                                            | 6  | 0        |
| BP | GO:0009209 | pyrimidine ribonucleoside triphosphate biosynthetic process | 3/736  | 0.089322 | Cad/Ctps2/Nme4                                                                                                                       | 3  | 1.732051 |
| BP | GO:2000303 | regulation of ceramide biosynthetic process                 | 3/736  | 0.089322 | Ormdl2/Pla2g6/Prkcd                                                                                                                  | 3  | 0.57735  |
| BP | GO:2000644 | regulation of receptor catabolic process                    | 3/736  | 0.089322 | Anxa2/Git1/Mtmr2                                                                                                                     | 3  | -0.57735 |

|      |            |                                                |        |          |                                                                                                                                                                    |    |           |
|------|------------|------------------------------------------------|--------|----------|--------------------------------------------------------------------------------------------------------------------------------------------------------------------|----|-----------|
| BP   | GO:0046879 | hormone secretion                              | 22/736 | 0.089322 | Adora3/Arntl/Bmp8a/Cckar/Cry2/Gck/Gip/Gja1/Gnas/Ifng/Il1rn/Kalrn/Kcnq1/Ly6e/Nnat/Nos2/Nucb2/Pde8b/Per2/Pfkfb2/Pla2g6/Pomc                                          | 22 | 0.852803  |
| BP   | GO:0009141 | nucleoside triphosphate metabolic process      | 19/736 | 0.089419 | Adk/Ampd2/Ampd3/Atp5c1/Atp5h/Bid/Cad/Ctps2/Entpd5/Gck/Hk1/Ifng/Igf1/Ndufv2/Nme4/Nudt1/P2rx7/Pfkfb2/Prkag2                                                          | 19 | 0.688247  |
| BP   | GO:0051881 | regulation of mitochondrial membrane potential | 8/736  | 0.089419 | Bid/Bok/Dcn/Hsh2d/Mapt/P2rx7/Rnf122/Spg20                                                                                                                          | 8  | 0         |
| BP   | GO:0032368 | regulation of lipid transport                  | 10/736 | 0.098593 | Abcb4/Anxa2/Cry2/Nr1h2/Nucb2/P2rx7/Pla2g6/Pltp/Pomc/Prkcd                                                                                                          | 10 | 0.632456  |
| BP   | GO:0015711 | organic anion transport                        | 24/736 | 0.098735 | Abcb1a/Abcb4/Atp11a/Atp8b4/Atp9b/Gja1/Il1rn/Nos2/P2rx7/Per2/Pla2g6/Plin2/Pltp/Prelid3b/Prkcd/Slc13a1/Slc17a4/Slc19a1/Slc27a1/Slc35c2/Slc43a1/Slc5a6/Slco4a1/Stra6l | 24 | 1.632993  |
| MF   | GO:0005085 | guanyl-nucleotide exchange factor activity     | 19/728 | 0.016389 | Abr/Arfgef1/Arhgef3/Arhgef39/Cyth2/Dennd4c/Eef1d/Hps1/Iqsec2/Itsn2/Kalrn/Mycbp2/Plekhg2/Plekhg5/Rasgef1a/Rpgr/Spata13/St5/Wdr41                                    | 19 | -0.229416 |
| KEGG | mmu04710   | Circadian rhythm                               | 9/340  | 0.000309 | Arntl/Cry2/Cul1/Npas2/Per1/Per2/Per3/Prkag2/Rorc                                                                                                                   | 9  | 0.333333  |
| KEGG | mmu04621   | NOD-like receptor signaling pathway            | 23/340 | 0.001098 | Casp8/Ccl12/Defa17/Defa2/Defa21/Defa22/Defa23/Defa24/Defa3/Defa30/Defa31/Defa33/Defa34/Defa36/Defa5/Ifi204/Ifi207/Mfn2/Nlrp3/Nlrp1/Oas2/P2rx7/Prkcd                | 23 | 3.127716  |
| KEGG | mmu05202   | Transcriptional misregulation in cancer        | 23/340 | 0.001241 | Arnt2/Ccnd2/Cdkn1b/Defa17/Defa2/Defa21/Defa22/Defa23/Defa24/Defa3/Defa30/Defa31/Defa33/Defa34/Defa36/Defa5/Fcgr1/Gria3/H3f3a/Igf1/Ntrk1/Per2/Zbtb16                | 23 | 3.544745  |
| KEGG | mmu05150   | Staphylococcus aureus infection                | 15/340 | 0.005046 | Defa17/Defa2/Defa21/Defa22/Defa23/Defa24/Defa3/Defa30/Defa31/Defa33/Defa34/Defa36/Defa5/Fcgr1/Krt14                                                                | 15 | 3.356586  |
