# Supplementary material for: The Protective Effects of Sour Orange (Citrus aurantium L.) Polymethoxyflavones on Mice Irradiation-Induced Intestinal Injury
Source: MDPI journal article supplement (doi:10.3390/molecules27061934), 2022-03-16
Supplement: s1 [file s1]

**Table S3.** Standard curves of monomers detected in this study

| No. | Linearity range<br>( $\mu\text{g/mL}$ ) | Regression equation   | Correlation<br>coefficient ( $R^2$ ) | LOD ( $\mu\text{g/mL}$ )* | LOQ ( $\mu\text{g/mL}$ )* | Recovery<br>rate<br>(%) | RSD*<br>(%) | Precision (n=6) |           |
|-----|-----------------------------------------|-----------------------|--------------------------------------|---------------------------|---------------------------|-------------------------|-------------|-----------------|-----------|
|     |                                         |                       |                                      |                           |                           |                         |             | Intra-day       | Inter-day |
| S1  | 2.0 - 400                               | $y=1591.1x - 2112.3$  | 0.9998                               | 0.7167                    | 1.7917                    | 3.58                    | 3.57        | 1.07            | 1.27      |
| S2  | 0.5-100                                 | $y=7010.5x - 2298.3$  | 0.9998                               | 0.0795                    | 0.4773                    | 97.22                   | 2.37        | 0.79            | 0.81      |
| S3  | 0.4-200                                 | $y=7029x - 5025.6$    | 0.9993                               | 0.2514                    | 0.5148                    | 94.03                   | 2.91        | 0.82            | 0.89      |
| S4  | 1.5-600                                 | $y=6954.3x + 1083.2$  | 0.9999                               | 0.0766                    | 0.9152                    | 99.79                   | 5.77        | 0.77            | 1.25      |
| S5  | 0.4-200                                 | $y=2375.2x - 242.9$   | 0.9999                               | 0.0539                    | 0.7329                    | 97.35                   | 2.49        | 0.56            | 0.78      |
| S6  | 0.15-50                                 | $y=24995x - 3153.2$   | 0.9994                               | 0.0290                    | 0.0871                    | 94.57                   | 1.48        | 0.81            | 1.69      |
| S7  | 0.5-25                                  | $y=4739.6x-26233$     | 0.9979                               | 0.0527                    | 0.2766                    | 95.37                   | 4.71        | 0.97            | 0.36      |
| S8  | 1.5-600                                 | $y=7079.5x+34278$     | 0.9998                               | 0.0787                    | 0.9273                    | 99.87                   | 5.74        | 0.78            | 1.21      |
| S9  | 0.5-200                                 | $y=7183.1x-16791$     | 0.9997                               | 0.1798                    | 0.4132                    | 98.79                   | 4.39        | 0.79            | 1.03      |
| S10 | 0.25-30                                 | $y=8564x + 628.8$     | 0.9996                               | 0.0631                    | 0.2314                    | 99.33                   | 3.14        | 0.78            | 1.38      |
| S11 | 0.25-30                                 | $y=10777x + 933.5$    | 0.9999                               | 0.0369                    | 0.1329                    | 100.42                  | 4.43        | 0.76            | 1.36      |
| S12 | 0.25-30                                 | $y=11289x + 27.6$     | 0.9998                               | 0.1114                    | 0.2227                    | 100.67                  | 2.90        | 0.65            | 1.26      |
| S13 | 0.25-30                                 | $y=9067.4x - 11468.2$ | 0.9994                               | 0.1297                    | 0.1622                    | 103.61                  | 3.49        | 0.75            | 0.59      |
| S14 | 0.5-50                                  | $y=9587x + 2886.9$    | 0.9992                               | 0.0532                    | 0.1926                    | 102.62                  | 3.04        | 0.77            | 1.22      |
| S15 | 0.25-100                                | $y=8790.4x + 721.7$   | 0.9991                               | 0.0625                    | 0.2249                    | 102.46                  | 3.66        | 0.75            | 1.67      |
| S16 | 0.25-50                                 | $y=4772.7x - 2342.2$  | 0.9992                               | 0.0487                    | 0.1487                    | 103.69                  | 2.76        | 0.83            | 0.45      |
| S17 | 0.5-80                                  | $y=6266.9 - 237.8$    | 0.9999                               | 0.0932                    | 0.2496                    | 101.12                  | 3.51        | 0.70            | 1.13      |

|     |         |                     |        |        |        |       |      |      |      |
|-----|---------|---------------------|--------|--------|--------|-------|------|------|------|
| S18 | 0.25-50 | $y=10893x - 1888.9$ | 0.9991 | 0.3180 | 0.9325 | 99.99 | 2.99 | 0.73 | 1.00 |
|-----|---------|---------------------|--------|--------|--------|-------|------|------|------|

\* LOD, limit of detection; LOQ, Limit of Quantitation; RSD, relative standard deviation.
