# Supplementary material for: The Protective Effects of Sour Orange (Citrus aurantium L.) Polymethoxyflavones on Mice Irradiation-Induced Intestinal Injury
Source: MDPI journal article supplement (doi:10.3390/molecules27061934), 2022-03-16
Supplement: s1 [file s1]

**Table S2.** The flavonoid standards used in this study.

| No. | Standard name                                 | Molecular formula                               | Molecular mass | CAS No.    | Purity   | Purchase source* |
|-----|-----------------------------------------------|-------------------------------------------------|----------------|------------|----------|------------------|
| S1  | Eriocitrin                                    | C <sub>27</sub> H <sub>32</sub> O <sub>15</sub> | 596.5321       | 13463-28-0 | ≥ 98.0 % | 1                |
| S2  | Rutin                                         | C <sub>27</sub> H <sub>32</sub> O <sub>14</sub> | 580.5319       | 14259-46-2 | ≥ 98.0 % | 1                |
| S3  | Naringin                                      | C <sub>21</sub> H <sub>22</sub> O <sub>8</sub>  | 580.5319       | 10236-47-2 | ≥ 98.0 % | 1                |
| S4  | Hesperidin                                    | C <sub>28</sub> H <sub>34</sub> O <sub>15</sub> | 610.5628       | 520-26-3   | ≥ 98.0 % | 1                |
| S5  | Diosmin                                       | C <sub>28</sub> H <sub>32</sub> O <sub>15</sub> | 608.5433       | 520-27-4   | ≥ 98.0 % | 1                |
| S6  | Didymin                                       | C <sub>28</sub> H <sub>34</sub> O <sub>14</sub> | 594.5674       | 14259-47-3 | ≥ 98.0 % | 1                |
| S7  | Neohesperidin                                 | C <sub>28</sub> H <sub>34</sub> O <sub>15</sub> | 610.5619       | 13241-33-3 | ≥ 95.0 % | 2                |
| S8  | Hesperetin                                    | C <sub>16</sub> H <sub>14</sub> O <sub>6</sub>  | 302.2835       | 520-33-2   | ≥ 95.0 % | 1                |
| S9  | Naringenin                                    | C <sub>15</sub> H <sub>12</sub> O <sub>5</sub>  | 272.2534       | 480-41-1   | ≥ 95.0 % | 1                |
| S10 | Isosinensetin                                 | C <sub>20</sub> H <sub>20</sub> O <sub>7</sub>  | 372.3686       | 17290-70-9 | ≥ 98.0 % | 1                |
| S11 | Sinensetin                                    | C <sub>20</sub> H <sub>20</sub> O <sub>7</sub>  | 372.3686       | 2306-27-6  | ≥ 98.0 % | 2                |
| S12 | 3',4',5,7 -<br>Tetrathoxyflavone              | C <sub>19</sub> H <sub>18</sub> O <sub>6</sub>  | 342.3403       | 855-97-0   | ≥ 97.0 % | 3                |
| S13 | 4',5,6,7 -<br>Tetrathoxyflavone               | C <sub>19</sub> H <sub>18</sub> O <sub>6</sub>  | 342.3403       | 1168-42-9  | ≥ 98.0 % | 4                |
| S14 | Nobiletin                                     | C <sub>21</sub> H <sub>22</sub> O <sub>8</sub>  | 402.3949       | 478-01-3   | ≥ 98.0 % | 1                |
| S15 | 3',4',3,5,6,7,8-<br>Hetamethoxyflavone        | C <sub>22</sub> H <sub>24</sub> O <sub>9</sub>  | 432.4355       | 1178-24-1  | > 98.0%  | 4                |
| S16 | 4',5,7-<br>Trimethoxyflavone                  | C <sub>18</sub> H <sub>16</sub> O <sub>5</sub>  | 312.3277       | 5631-70-9  | ≥ 98.7 % | 3                |
| S17 | 5-Hydroxy-6,7,8,3',4'-<br>pentamethoxyflavone | C <sub>20</sub> H <sub>20</sub> O <sub>8</sub>  | 388.3716       | 2174-59-6  | ≥ 98.0 % | 4                |
| S18 | Tangeretin                                    | C <sub>20</sub> H <sub>20</sub> O <sub>7</sub>  | 372.3686       | 481-53-8   | ≥ 98.0 % | 1                |

\*1-Chroma Dex; 2- Sigma-Aldrich; 3- Chengdu Chroma-Biotechnology Co., Ltd.; 4- Chengdu Biopurify Phytochemicals Ltd.
